# Supplementary material
Source: publisher site journal article supplement (https://www.dovepress.com/article/129059)

## SUPPLEMENTAL MATERIALS

### Supplemental Table 1.

Supplementary Table 1: Study Investigator list (77 sites)

| PI Name              | Institution                                                                               | Address                                        | City & State    | SMO                                    |
|----------------------|-------------------------------------------------------------------------------------------|------------------------------------------------|-----------------|----------------------------------------|
| Dr. Richy Agajanian  | The Oncology Institute of Hope and Innovation                                             | 11480 Brookshire Avenue, Suite 209             | Downey, CA      | Innovative Clinical Research Institute |
| Dr. Sang-Hoon Ahn    | LA Cancer Center                                                                          | 500 S. Virgil Avenue, Suite 502                | Los Angeles, CA | Innovative Clinical Research Institute |
| Dr. Arevalo Araujo   | Pasco Pinellas Cancer Center                                                              | 3000 US Hwy 19                                 | Holiday, FL     | NA                                     |
| Dr. Ronald Scroggin  | Northeast Arkansas Clinic Charitable Foundation, dba Fowler Family Center for Cancer Care | 4808 East Johnson Avenue                       | Jonesboro, AR   | NA                                     |
| Dr. Veena Charu      | Pacific Cancer Medical Center, Inc                                                        | 1801 W. Romneya Drive, Suite 203               | Anaheim, CA     | NA                                     |
| Dr. Nashat Gabrail   | Gabraail Cancer Center Research                                                           | 4875 Higbee Avenue NW                          | Canton, OH      | NA                                     |
| Dr. Charles Holladay | Charleston Cancer Center                                                                  | 2910 Tricom Street                             | Charleston, SC  | NA                                     |
| Dr. John Hrom        | Forrest General Cancer Center                                                             | 301 South 28th Avenue                          | Hattiesburg, MS | NA                                     |
| Dr. Edward Kaplan    | Edward H. Kaplan MD and Associates                                                        | 9631 Gross Point Road, Suite 10                | Skokie, IL      | NA                                     |
| Dr. Tim Kasunic      | ProMedica Cancer Institute at Flower Hospital                                             | 5200 Harroun                                   | Sylvania, OH    | NA                                     |
| Dr. Gregory Long     | Allegheny General Hospital                                                                | 320 East North Avenue, Allegheny Cancer Center | Pittsburgh, PA  | Allegheny Singer Research Institute    |
| Dr. Raul Mena        | East Valley Hematology and Oncology Medical Group                                         | 181 S. Buena Vista Avenue, 4th Floor           | Burbank, CA     | Innovative Clinical Research Institute |

| PI Name                               | Institution                                                 | Address                             | City & State        | SMO                       |
|---------------------------------------|-------------------------------------------------------------|-------------------------------------|---------------------|---------------------------|
| Dr. Dhimant Patel                     | Vince Lombardi Cancer Center, Aurora BayCare Medical Center | 2845 Greenbrier Road                | Green Bay, WI       | NA                        |
| Dr. John Waples                       | Clearview Cancer Institute                                  | 3601 CCI Drive                      | Huntsville, AL      | NA                        |
| Dr. Rephena Baqai                     | Compassionate Cancer Care Medical Center                    | 260 East Ontario Avenue, Suite 101  | Corona, CA          | Compassionate Cancer Care |
| Dr. Ralph Boccia                      | The Center for Cancer and Blood Disorders                   | 6410 Rockledge Drive, Suite 660     | Bethesda, MD        | NA                        |
| Dr. Marie Grosse-Perdekamp            | Carle Foundation Hospital, dba Carle Cancer Center          | 509 W. University Avenue            | Urbana, IL          | NA                        |
| Dr. Hareh Jhangiani                   | Compassionate Cancer Care Medical Group, Inc                | 18111 Brookhurst Street, Suite 6100 | Fountain Valley, CA | Compassionate Cancer Care |
| Dr. Mark Taylor                       | Summit Cancer Care                                          | 225 Candler Drive, Suite 300        | Savannah, GA        | NA                        |
| Dr. Robert Smith                      | South Carolina Oncology Associates                          | 166 Stoneridge Drive                | Columbia, SC        | NA                        |
| Dr. Brian Choi                        | Compassionate Cancer Care Medical Center                    | 4500 Brockton Avenue, Suite 107     | Riverside, CA       | Compassionate Cancer Care |
| Dr. Shaker Dakhil                     | Cancer Center of Kansas                                     | 818 N. Emporia, #403                | Wichita, KS         | NA                        |
| Dr. Vincent Hansen                    | Northern Utah Associates                                    | 4403 Harrison Blvd.                 | Ogden, UT           | NA                        |
| Dr. Charles Taylor (previously McHam) | Tulsa Cancer Institute                                      | 12697 East 51st Street South        | Tulsa, OK           | NA                        |
| Dr. Praveen Kollipara                 | Fort Wayne Medical Oncology and Hematology                  | 7910 West Jefferson Blvd.           | Fort Wayne, IN      | NA                        |
| Dr. Mikhail Shtivelband               | Ironwood Cancer Centers                                     | 685 S. Dobson Road                  | Chandler, AZ        | NA                        |
| Dr. Eduardo Braun                     | Northern Indiana Research Consortium                        | 3975 William Richardson Drive       | South Bend, IN      | NA                        |
| Dr. Jeff Vacirca                      | North Shore Oncology                                        | 235 N. Bell Mead Road               | East Setauket, NY   | NA                        |

| PI Name                                    | Institution                                       | Address                                                 | City & State      | SMO        |
|--------------------------------------------|---------------------------------------------------|---------------------------------------------------------|-------------------|------------|
| Dr. Rishi Sawhney                          | Valley Medical Oncology Consultants               | 5725 West Las Positas Blvd., Suite 100                  | Pleasanton, CA    | NA         |
| Dr. Sudjith Kalmadi                        | Ironwood Cancer Centers                           | 1432 S. Dobson Road, #106                               | Mesa, AZ          | NA         |
| Dr. Dilip Solanki (replaced Dr. John Cox)  | Texas Oncology-Methodist Charlton Cancer Center   | 3555 W. Wheatland Road                                  | Dallas, TX        | USOncology |
| Dr. Carl Chakmakjian                       | Texas Oncology-Waco                               | 1700 W. Hwy 6                                           | Waco, TX          | USOncology |
| Dr. Scott Fleishauer                       | Texas Oncology-Arlington South                    | 515 W. Mayfield Road, Suite 101                         | Arlington, TX     | USOncology |
| Dr. Kristi McIntyre                        | Texas Oncology-Dallas Presbyterian Hospital       | 8220 Walnut Hill Lane, Professional Bldg. II, Suite 700 | Dallas, TX        | USOncology |
| Dr. Derrick Nguyen                         | Texas Oncology-Flower Mound                       | 4370 Medical Arts Drive, Suite 100                      | Flower Mound, TX  | USOncology |
| Dr. Ian Schnadig                           | Northwest Cancer Specialists, P.C.                | 19260 SW 65th Avenue, Suite 435                         | Tualatin, OR      | USOncology |
| Dr. Christopher Stokoe                     | Texas Oncology-Plano East                         | 3705 W. 15th Street                                     | Plano, TX         | USOncology |
| Dr. Brian Ulrich                           | Texas Oncology-Wichita Falls Texoma Cancer Center | 5400 Kell West Blvd.                                    | Wichita Falls, TX | USOncology |
| Dr. Nicholas Vogelzang                     | Comprehensive Cancer Centers of Nevada            | 3730 S. Eastern Avenue                                  | Las Vegas, NV     | USOncology |
| Dr. Guillermo Lazo-Diaz (previously Marek) | Texas Oncology-McAllen South Second Street        | 1901 South 2nd Street                                   | McAllen, TX       | USOncology |
| Dr. Manish Gupta                           | Texas Oncology-Garland                            | 530 Clara Barton, Suite 250                             | Garland, TX       | USOncology |
| Dr. Kurt Ebrahim                           | New England Cancer Specialists                    | 100 Campus Drive, Suite 108                             | Scarborough, ME   | NA         |
| Dr. Thomas Anderson                        | Texas Oncology-Bedford                            | 1615 Hospital Parkway, Suite 300                        | Bedford, TX       | USOncology |
| Dr. Lenardo Forero                         | Texas Oncology-Amarillo                           | 1000 S. Coulter, Suite 100                              | Amarillo, TX      | USOncology |
| Dr. Sharad Jain                            | Texas Oncology-Denton South                       | 3720 S. I 35 E                                          | Denton, TX        | USOncology |

| PI Name                | Institution                                                   | Address                                        | City & State      | SMO        |
|------------------------|---------------------------------------------------------------|------------------------------------------------|-------------------|------------|
| Dr. Deborah Lindquist  | Arizona Oncology Associates, PC - NAHOA                       | 3700 W State Route 89A                         | Sedona, AZ        | USOncology |
| Dr. Scott McKenney     | Texas Oncology-Beaumont, Mamie McFaddin Ward Cancer Center    | 690 N. 14th Street                             | Beaumont, TX      | USOncology |
| Dr. Anton Melnyk       | Texas Oncology-Abilene                                        | 1957 Antilley Road                             | Abilene, TX       | USOncology |
| Dr. Donald Richards    | Texas Oncology-Tyler                                          | 910 E. Houston Street, Suite 100               | Tyler, TX         | USOncology |
| Dr. Mahesh Seetharam   | Arizona Oncology Associates, PC - HAL                         | 2222 E. Highland Avenue, Suite 400             | Phoenix, AZ       | USOncology |
| Dr. Galina Vugman      | Watson Clinic for Research                                    | 1730 Lakeland Hills Blvd.                      | Lakeland, FL      | USOncology |
| Dr. David Watkins      | Texas Oncology-Midland Allison Cancer Center                  | 400 Rosalind Redfern Grover Parkway, Suite 100 | Midland, TX       | USOncology |
| Dr. Sharon Wilks       | Cancer Care Centers of South Texas                            | 2130 N. E. Loop 410, Suite 100                 | San Antonio, TX   | USOncology |
| Dr. Alexander Zweibach | Cancer Care Centers of South Texas - HOAST                    | 1448 East Common Street                        | New Braunfels, TX | USOncology |
| Dr. Lanie Francis      | UPMC                                                          | 5150 Centre Avenue, 3rd Floor, Suite 310       | Pittsburgh, PA    | NA         |
| Dr. James Mitchell     | Virginia Cancer Institute                                     | 6605 W Broad Street, Suite A                   | Richmond, VA      | NA         |
| Dr. Mark Knapp         | MidOhio Oncology/Hematology (Zangmeister Center)              | 3100 Plaza Properties Blvd.                    | Columbus, OH      | NA         |
| Dr. Lee Schwartzberg   | The West Clinic                                               | 100 North Humphreys Blvd.                      | Memphis, TN       | Acorn      |
| Dr. Tracy Dobbs        | Center for Biomedical Research/Tennessee Oncology Specialists | 1415 Old Weisgarber Road, Suite 200            | Knoxville, TN     | NA         |
| Dr. Steve Dunder       | Southeast Nebraska Cancer Center                              | 201 S 68th Street Pl., Suite 200               | Lincoln, NE       | NA         |
| Dr. Bilal Ansari       | Northern Indiana Research Consortium                          | 5340 Holy Cross Pkwy                           | Mishawaka, IN     | NA         |
| Dr. Sreeni Chittoor    | Texas Oncology-Mesquite/Rockwell                              | 4700 N. Galloway Avenue                        | Mesquite, TX      | USOncology |

| PI Name                 | Institution                                    | Address                                    | City & State     | SMO             |
|-------------------------|------------------------------------------------|--------------------------------------------|------------------|-----------------|
| Dr. Kirti Jain          | Asheland-Bellafonte Cancer Center              | 122 St. Christopher Drive                  | Asheland, KY     | Sargon Research |
| Dr. Simon Tchekmedyan   | Pacific Shores Medical Group                   | 1043 Elm Street, Suite 104                 | Long Beach, CA   | NA              |
| Dr. Satish Shah         | Gettysburg Cancer Center                       | 20 Expedition Trail, Suite 101             | Gettysburg, PA   | Sargon Research |
| Dr. Osama Hlalah        | Bond Clinic                                    | 500 E. Central Avenue                      | Winter Haven, FL | Sargon Research |
| Dr. Jawad Francis       | St. Francis Cancer Center                      | 667 Eastland Avenue                        | Warren, OH       | NA              |
| Dr. Xingwei Sui         | Providence Regional Cancer System              | 4523 3rd Avenue, Suite 200                 | Lacey, WA        | NA              |
| Dr. Patricia Rizzo      | Chevy Chase Oncology                           | 5454 Wisconsin Avenue, Suite 1300          | Chevy Chase, MD  | NA              |
| Dr. Yosoda Devabhaktuni | Floyd Memorial Cancer Center of Indiana        | 2210 Green Valley Road                     | New Albany, IN   | Sargon Research |
| Dr. Nohit Narang        | Maryland Oncology Hematology P.A.              | 10710 Charter Drive, Suite G020            | Columbia, MD     | USOR            |
| Dr. Scott Tetreault     | Florida Cancer Specialist & Research Institute | 1600 Phillips Road, Suite 300              | Tallahassee, FL  | FCS             |
| Dr. Robert Whorf        | Florida Cancer Specialist & Research Institute | 4331 Veronica S. Shoemaker Blvd., Suite 15 | Fort Myers, FL   | FCS             |
| Dr. Peter Acs           | Florida Cancer Specialist & Research Institute | 4331 Veronica S. Shoemaker Blvd., Suite 15 | Fort Myers, FL   | FCS             |
| Dr. William Houck       | Shenandoah Oncology                            | 1870 Amherst Street, Suite F               | Winchester, VA   | US Oncology     |
| Dr. Sashi Naidu         | Carolina Blood and Cancer Care                 | 1583 HealthCare Drive                      | Rock Hill, SC    | Sargon Research |
| Dr. Ariel Lee           | Tyler Hematology and Oncology                  | 721 Clinic Drive, Suite A                  | Tyler, TX        | Sargon Research |

**Supplemental Figure 1.** Kaplan-Meier plot of time to first rescue medication use (modified intent-to-treat population). Days elapsed since study drug administration, where 0=event or censored on study day 1, 4=event or censored on study day 5.

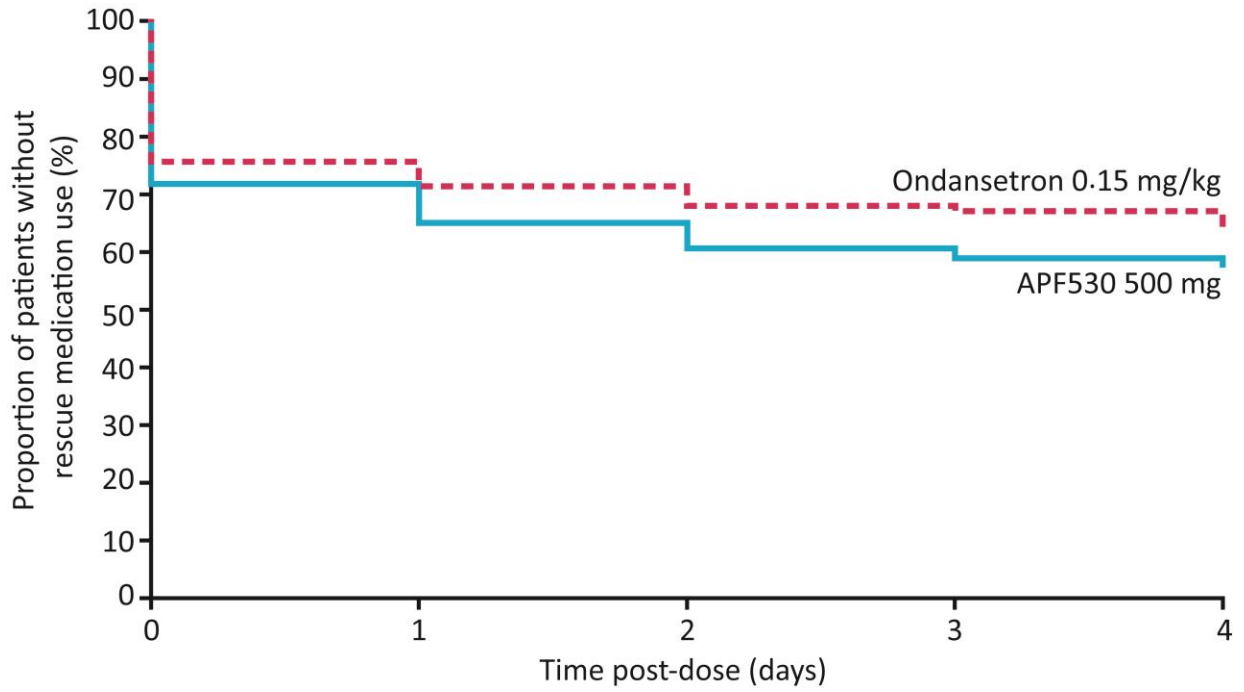

Supplement: Supplementary file 1 [file get_supplementary_file.php]
